# Supplementary material for: Development of an efficient Sanger sequencing-based assay for detecting SARS-CoV-2 spike mutations
Source: PubMed Central journal article supplement (PMC8670694; doi:10.1371/journal.pone.0260850), 2021-12-14
Supplement: pone.0260850.s002.pdf [file pone.0260850.s002.pdf]

| Primer | Target variant | CDC classification and lineage                                                                   |                                                                        | Sanger sequencing result (detection strain)                                                                                                                       |
|--------|----------------|--------------------------------------------------------------------------------------------------|------------------------------------------------------------------------|-------------------------------------------------------------------------------------------------------------------------------------------------------------------|
|        |                | VOI                                                                                              | VOC                                                                    |                                                                                                                                                                   |
| 69S    | A67V           | eta (B.1.525)                                                                                    |                                                                        | NCCP-43386                                                                                                                                                        |
|        | ΔH69/V70       | eta (B.1.525)                                                                                    | alpha (B.1.1.7)                                                        | Twistbio-601443, Twistbio-7105258, NCCP-43381, NCCP-43386                                                                                                         |
|        | D80A           |                                                                                                  | beta (B.1.351)                                                         | Twistbio-678597, NCCP-43382                                                                                                                                       |
|        | T95I           | iota (B.1.526)                                                                                   | delta (1.617.2)                                                        | NCCP-43387                                                                                                                                                        |
| 144S   | D138Y          |                                                                                                  | gamma (P.1)                                                            | Twistbio-79683                                                                                                                                                    |
|        | G142D          | kappa (1.617.1)                                                                                  | delta (1.617.2)                                                        | NCCP-43389, NCCP-43390                                                                                                                                            |
|        | ΔY144          | eta (B.1.525)                                                                                    | alpha (B.1.1.7)                                                        | Twistbio-601443, Twistbio-7105258, NCCP-43381, NCCP-43386                                                                                                         |
|        | W152C          | epsilon (B.1.429)                                                                                |                                                                        | NCCP-43384, NCCP-43385                                                                                                                                            |
|        | E154K          | kappa (1.617.1)                                                                                  |                                                                        | NCCP-43389                                                                                                                                                        |
|        | ΔE156/F157     |                                                                                                  | delta (1.617.2)                                                        | NCCP-43390                                                                                                                                                        |
|        | R158G          |                                                                                                  | delta (1.617.2)                                                        | NCCP-43390                                                                                                                                                        |
|        | R190S          |                                                                                                  | gamma (P.1)                                                            | Twistbio-79683                                                                                                                                                    |
|        | D215G          |                                                                                                  | beta (B.1.351)                                                         | Twistbio-678597, NCCP-43382                                                                                                                                       |
|        | D253G          | iota (B.1.526)                                                                                   |                                                                        | NCCP-43387                                                                                                                                                        |
| 417S   | K417T          |                                                                                                  | gamma (P.1)                                                            | Twistbio-79683                                                                                                                                                    |
|        | K417N          |                                                                                                  | beta (B.1.351)                                                         | Twistbio-678597, NCCP-43382                                                                                                                                       |
|        | L452R          | epsilon (B.1.427),<br>epsilon (B.1.429),<br>kappa (1.617.1)                                      | delta (1.617.2)                                                        | NCCP-43384, NCCP-43385, NCCP-43389, NCCP-43390                                                                                                                    |
| 484S   | T478K          |                                                                                                  | delta (1.617.2)                                                        | NCCP-43390                                                                                                                                                        |
|        | E484K          | eta (B.1.525),<br>iota (B.1.526)                                                                 | beta (B.1.351),<br>gamma (P.1)                                         | Twistbio-678597, NCCP-43382, NCCP-43386, NCCP-43387, Twistbio-79683                                                                                               |
|        | E484Q          | kappa (1.617.1)                                                                                  |                                                                        | NCCP-43389                                                                                                                                                        |
|        | N501Y          |                                                                                                  | alpha (B.1.1.7),<br>beta (B.1.351),<br>gamma (P.1)                     | Twistbio-601443, Twistbio-678597, Twistbio-710528, Twistbio-79683, NCCP-43381, NCCP-43382                                                                         |
| 570S   | A570D          |                                                                                                  | alpha (B.1.1.7)                                                        | Twistbio-710528, Twistbio-601443, NCCP-43381                                                                                                                      |
|        | D614G          | eta (B.1.525),<br>iota (B.1.526),<br>epsilon (B.1.427),<br>epsilon (B.1.429),<br>kappa (1.617.1) | alpha (B.1.1.7),<br>beta (B.1.351),<br>gamma (P.1),<br>delta (1.617.2) | Twistbio-601443, Twistbio-710528, Twistbio-678597, Twistbio-79683, NCCP-43381, NCCP-43382, NCCP-43384, NCCP-43385, NCCP-43386, NCCP-43387, NCCP-43389, NCCP-43390 |
|        | H655Y          | iota (B.1.526)                                                                                   | gamma (P.1)                                                            | Twistbio-79683, NCCP-43387                                                                                                                                        |
|        | Q677H          | eta (B.1.525)                                                                                    |                                                                        | NCCP-43386                                                                                                                                                        |
|        | P681H          |                                                                                                  | alpha (B.1.1.7)                                                        | Twistbio-710528, Twistbio-601443, NCCP-43381                                                                                                                      |
|        | P681R          | kappa (1.617.1)                                                                                  | delta (1.617.2)                                                        | NCCP-43389, NCCP-43390                                                                                                                                            |
|        | A701V          | iota (B.1.526)                                                                                   | beta (B.1.351)                                                         | Twistbio-678597, NCCP-43382, NCCP-43387                                                                                                                           |
| T716I  |                | alpha (B.1.1.7)                                                                                  | Twistbio-710528, Twistbio-601443, NCCP-43381                           |                                                                                                                                                                   |
