# Supplementary material for: Development of an efficient Sanger sequencing-based assay for detecting SARS-CoV-2 spike mutations
Source: PubMed Central journal article supplement (PMC8670694; doi:10.1371/journal.pone.0260850), 2021-12-14
Supplement: pone.0260850.s003.pdf [file pone.0260850.s003.pdf]

| Group                      | Strain                                | Source       | PCR result |
|----------------------------|---------------------------------------|--------------|------------|
| Virus                      | Dengue virus type 2                   | ATCC VR-1584 | Negative   |
|                            | Dengue virus type 4                   | ATCC VR-1490 | Negative   |
|                            | Herpes virus type 2                   | ATCC-VR-734  | Negative   |
|                            | Echovirus 30                          | KBPV-VR-25   | Negative   |
|                            | Human Adenovirus type 40              | ATCC VR-931  | Negative   |
|                            | Human Parvovirus-B19                  | NIBSC-12/208 | Negative   |
|                            | BK virus                              | ATCC VR-837  | Negative   |
|                            | Coxsackie virus B3                    | ATCC VR-30   | Negative   |
| Coxsackie virus B5         | ATCC VR-185                           | Negative     |            |
| Bacteria                   | <i>Enterococcus faecium</i>           | KCTC-13225   | Negative   |
|                            | <i>Enterococcus faecalis</i>          | KCTC-5290    | Negative   |
|                            | <i>Staphylococcus Saprophyticus</i>   | KCTC-3345    | Negative   |
|                            | <i>Streptococcus agalactiae</i>       | ATCC-12928   | Negative   |
|                            | <i>Klebsiella quasipneumoniae sub</i> | ATCC-700603  | Negative   |
|                            | <i>Lactobasillus jensenii</i>         | ATCC-25258   | Negative   |
|                            | <i>Lactobasillus gasseri</i>          | ATCC-33323   | Negative   |
|                            | <i>Lactobasillus crispatus</i>        | ATCC-33820   | Negative   |
|                            | <i>Proteus mirabilis</i>              | ATCC-29906   | Negative   |
| <i>Haemophilus ducreyi</i> | ATCC-33940                            | Negative     |            |
